# Supplementary material
Source: PubMed Central journal article supplement (PMC7008471)

Figure S2

D-dfTAT (5  $\mu$ M)  
TMR/Hoechst/SYTOX

D-dfTAT (1  $\mu$ M)  
TMR/Hoechst/SYTOX

D-dfTAT (1  $\mu$ M) + UNC7938  
TMR/Hoechst/SYTOX

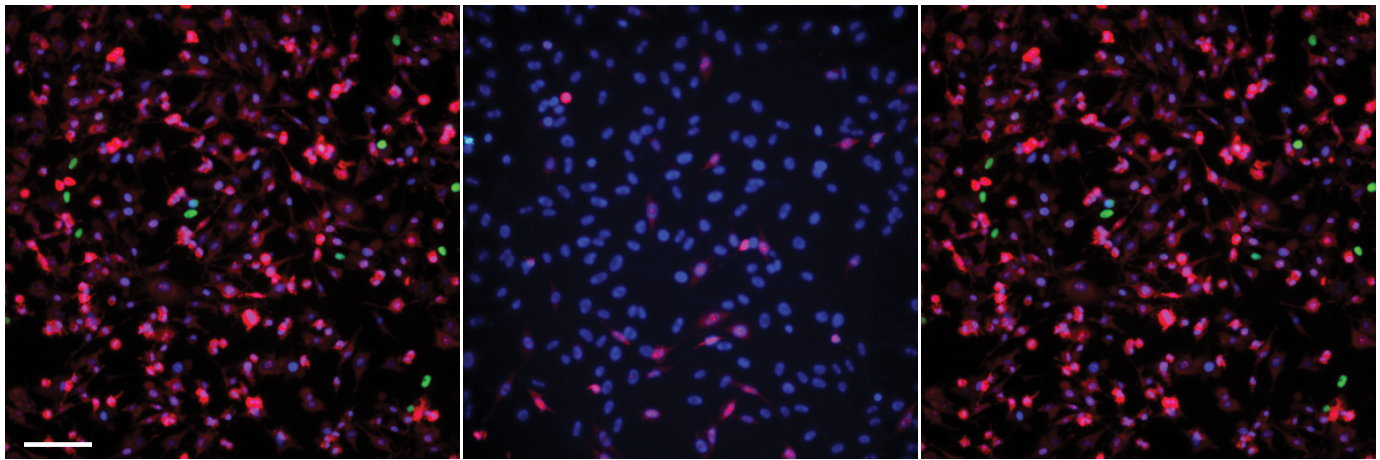

D-dfTAT (1  $\mu$ M)  
TMR

D-dfTAT (1  $\mu$ M) + UNC7938  
TMR

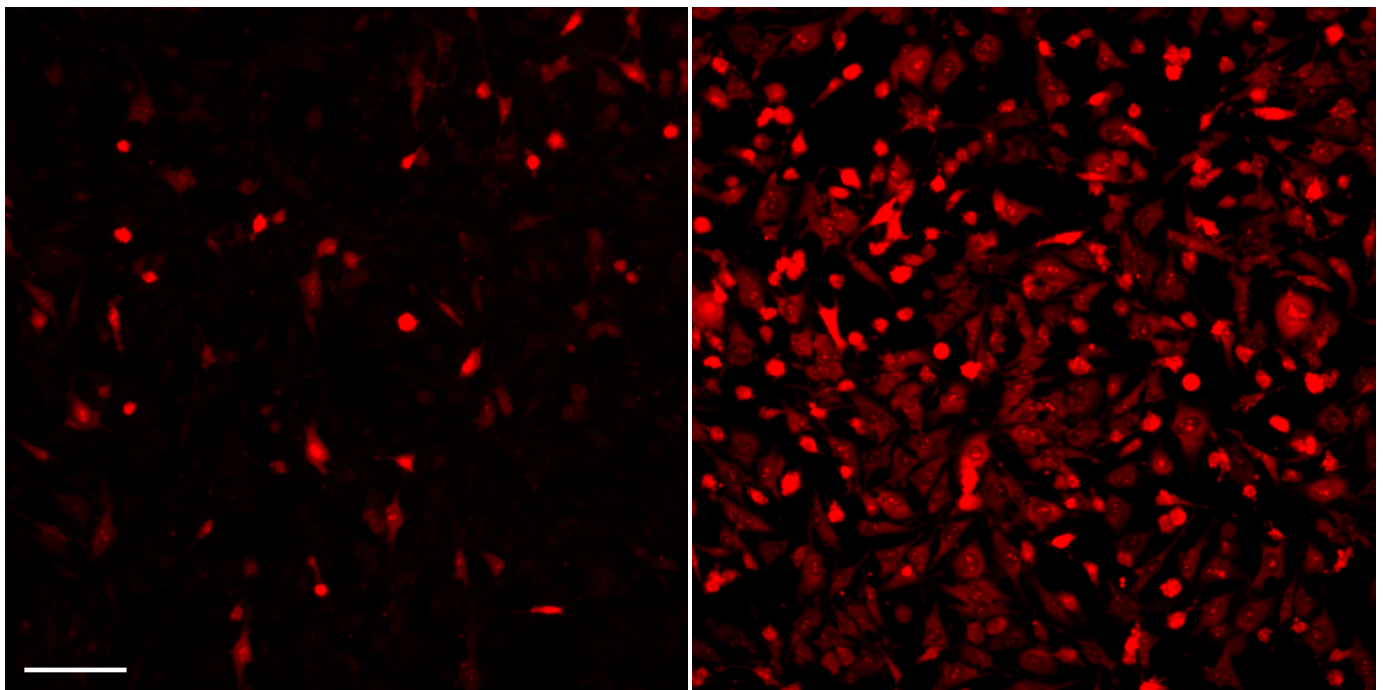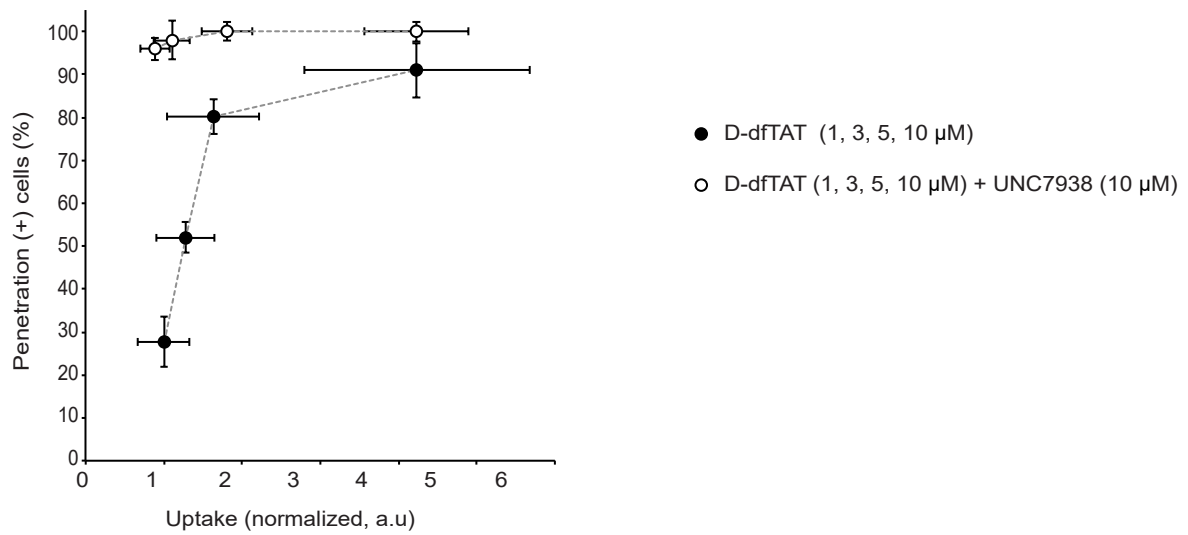

Supplement: NIHMS1553020-supplement-fig_S2.pdf [file NIHMS1553020-supplement-fig_S2.pdf]
